# Supplementary material for: 646 Cr(VI)耐性菌Pseudomonas ambigua G-1のCr(VI)還元酵素遺伝子(chrR)のクローニングと遺伝子解析
Source: PLOS journal article supplement (doi:10.1371/journal.pone.0026972), 1995-09-15
Supplement: S1 (10.1371/journal.pone.0026972.s001) [file journal.pone.0026972.s001]

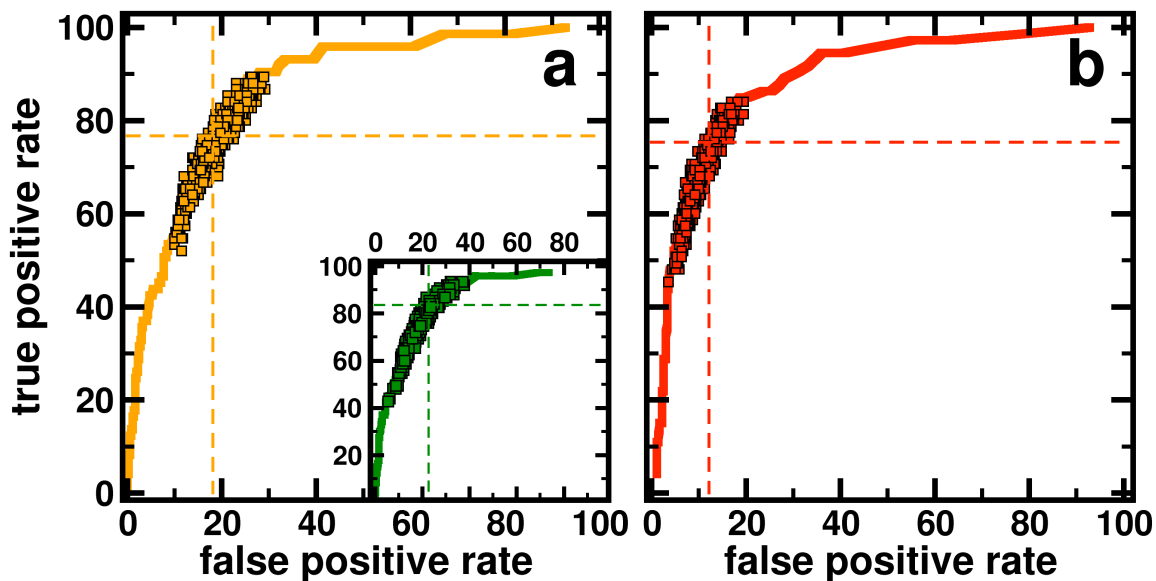

**Figure S1: (A)** Utilizing the total volume method, we converted emails to social attachments. In the ROC, we indicated best FPR = 18.2% and TPR = 76.7% (dashed orange lines). Testing the robustness of our methods by randomly splitting the email transmissions into a “test” and “retest” set, we found a mean FPR =  $18.7 \pm 4.4$  and a mean TPR =  $74.5 \pm 8.0$ . In the inset, we found best FPR = 22.7% and TPR = 83.6% utilizing the reciprocation method (dashed green lines). After a test-retest analysis, the reciprocation method provided a mean FPR =  $20.7 \pm 5.6$  and a mean TPR =  $77.1 \pm 9.2$ .

**(B)** Using the normalization method, we found a mean FPR =  $10.7 \pm 3.0$  and a mean TPR =  $74.5 \pm 8.0$  in a test-retest step, results that correlate well with the best FPR = 12.2% and TPR = 75.3%.
