# Supplementary material for: 646 Cr(VI)耐性菌Pseudomonas ambigua G-1のCr(VI)還元酵素遺伝子(chrR)のクローニングと遺伝子解析
Source: PLOS journal article supplement (doi:10.1371/journal.pone.0026972), 1995-09-15
Supplement: S7 (10.1371/journal.pone.0026972.s007) [file journal.pone.0026972.s007]

**Table S2:** We show Pearson's correlations between a person's self-reported and email derived network characteristics for the 31 partners in the same office, utilizing the randomized total volume (rVM), reciprocation (rRM) and normalization method (rNM).

| N = 31                  | <b>total volume</b> | <b>reciprocation</b> | <b>normalization</b> |
|-------------------------|---------------------|----------------------|----------------------|
|                         | <b>rVM</b>          | <b>rRM</b>           | <b>rNM</b>           |
| <b>degree</b>           | <b>0.72***</b>      | <b>0.75***</b>       | <b>0.64***</b>       |
| <b>clustering</b>       | <b>0.32*</b>        | <b>0.49*</b>         | <b>0.31*</b>         |
| <b>shortest path</b>    | <b>0.38*</b>        | <b>0.36*</b>         | <b>0.37*</b>         |
| <b>betweenness</b>      | <b>0.60***</b>      | <b>0.60***</b>       | <b>0.36*</b>         |
| <b>structural holes</b> | <b>0.48**</b>       | <b>0.51**</b>        | <b>0.34*</b>         |

\*\*\* P < 0.001, \*\* P < 0.01, \* P < 0.05
